# Supplementary material for: The RNA-binding protein ZC3H11A interacts with the nuclear poly(A)-binding protein PABPN1 and alters polyadenylation of viral transcripts
Source: PubMed Central journal article supplement (PMC10371797; doi:10.1016/j.jbc.2023.104959), 2023-06-23
Supplement: mmc1.pdf [file mmc1.pdf]

**The RNA-binding protein ZC3H11A interacts with the nuclear poly(A)-binding protein PABPN1 and alters polyadenylation of viral transcripts**

Katharina Kases, Erik Schubert, Zamaneh Hajikhezri, Mårten Larsson, Priya Devi, Mahmoud Darweesh, Leif Andersson, Göran Akusjärvi, Tanel Punga, Shady Younis

Figure S1. A comparison between human and mouse ZC3H11A interactome.

Figure S2. MS analysis of ZC3H11A-Flag interacting proteins in HeLa cells.

Figure S3. Immunofluorescence analysis of the ZC3H11A-Flag protein in nuclear speckles in HeLa cells.

Figure S4. Expression levels of the ZC3H11A mutant proteins in HAdV-5-infected A549 cells.

Table S1. List of PCR primers used in this study.



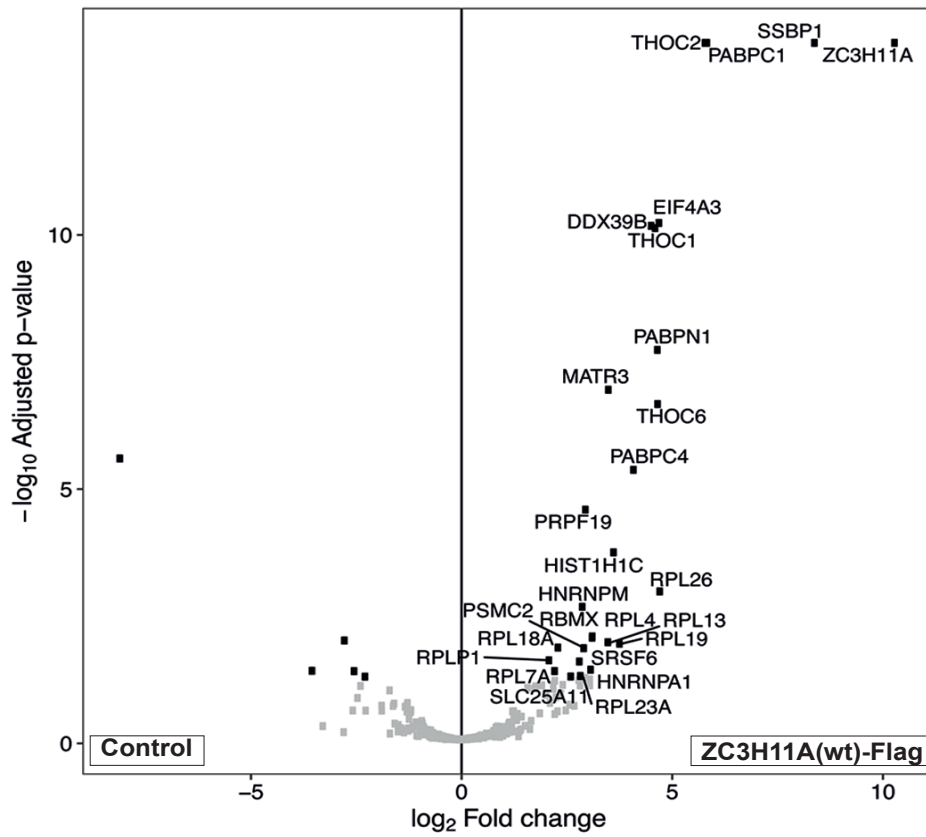

Figure S2. The ZC3H11A-Flag interacts with subunits of the TREX complex and PABPs. Volcano plot showing identified proteins that specifically interact with the ZC3H11A(wt)-Flag protein in HeLa cells. An adjusted P-value cut off of 0.05 and a  $\log_2$  fold change cut off of 2 was used. Data are shown from a biological triplicate experiment. Control; cells transfected with pcDNA(C-Flag) plasmid, ZC3H11A(wt)-Flag; cells transfected with pcDNA-ZC3H11A(wt)-Flag plasmid.

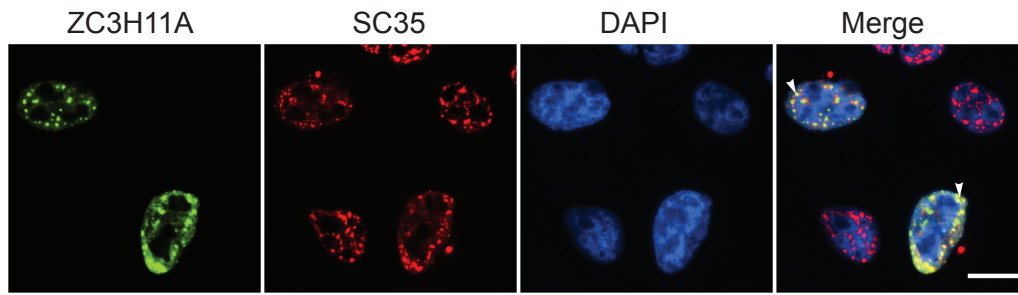

Figure S3. ZC3H11A localization into nuclear speckles. HeLa cells were transfected with the ZC3H11A-Flag encoding plasmids for 24 h. Indirect immunofluorescence (IF) was done with the anti-Flag and anti-SC35 antibodies. Cells were counterstained with DAPI. White arrowheads indicate typical colocalization of the SC35 and ZC3H11A-Flag. Scalebar is 20  $\mu\text{m}$ .

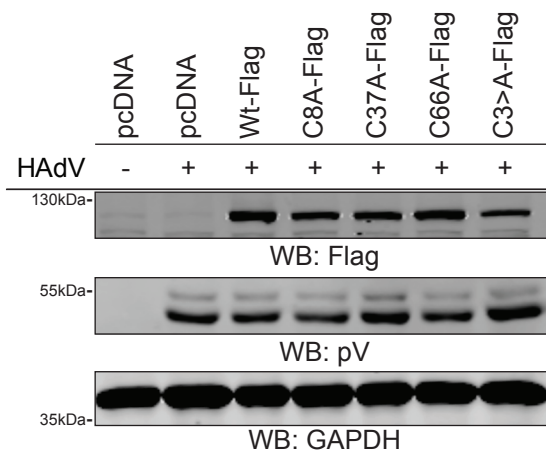

Figure S4. Expression levels of the ZC3H11A-Flag mutant proteins in HAdV-5-infected A549 cells. Cells were transfected with respective plasmids for 24h, followed by HAdV-5 infection (MOI= 5, 48h). Whole cell lysates were separated on 9% SDS-PAGE and western blot was done using the anti-Flag (detects ZC3-Flag), anti-pV (virus capsid protein, marker for HAdV-5 infection) and anti-GAPDH antibodies.

**Table S1.**

List of PCR primers used in this study

| Target Purpose                                      | Forward primer (5'-3')        | Reverse primer (5'-3')                |
|-----------------------------------------------------|-------------------------------|---------------------------------------|
| <b>SNHG10</b><br>qRT-PCR                            | GTTATTGACTTCCTACCCAGCA        | CTGGAATCAATGAATCACGTTCC               |
| <b>SNHG19</b><br>qRT-PCR                            | CGTCCAGGCCTGGCCTAC            | GCTCGCGACGAAACCTGC                    |
| <b>HAdV-5 pVI</b><br>qRT-PCR                        | AGGCGTCTAACCAGTCACAGT<br>C    | CTTGCCAGTTTCCCATGAACGG                |
| <b>HAdV-5 pVII</b><br>qRT-PCR                       | CGAGGGACCTGAGCGAGTC           | GCCCCAGCCTGTGTTATTGC                  |
| <b>HAdV-5 Hexon</b><br>qRT-PCR                      |                               | TGTAAGACCACTGCGGCATC                  |
| <b>HAdV-5 Fiber</b><br>qRT-PCR                      |                               | GAGGACCGGTTTCCGTGTCA                  |
| <b>HPRT1</b><br>qRT-PCR                             | TGGACAGGACTGAACGTCTTG         | CCAGCAGGTCAGCAAAGAATTTA               |
| <b>ePAT</b><br>Jänicke., 2012                       |                               | GCGAGCTCCGCGGCCGCGTTTTTTTTTTT<br>TT   |
| <b>TVN-PAT</b><br>Jänicke., 2012                    |                               | GCGAGCTCCGCGGCCGCGTTTTTTTTTTT<br>TTVN |
| <b>ePAT/TVN-PAT<br/>Universal</b><br>Jänicke., 2012 |                               | GCGAGCTCCGCGGCCGCGT                   |
| <b>ePAT/TVN-PAT</b><br>HAdV-5 L3 pA                 | GCAGCCACAGTGCGCAGATTA<br>GGAG |                                       |
| <b>ePAT/TVN-PAT</b><br>HAdV-5 L5 pA                 | CCATTACACTAAACGGTACACA<br>GGA |                                       |
